# Supplementary material for: Experimental and Theoretical Approaches of New Nematogenic Chair Architectures of Supramolecular H-Bonded Liquid Crystals
Source: MDPI journal article supplement (doi:10.3390/molecules25020365), 2020-01-16
Supplement: s1 [file s1]

## Supplementary data

### Experimental and theoretical approaches of new nematogenic chair architectures of supramolecular H-bonded liquid crystals

O.A. Alhaddad<sup>1</sup>, H.A. Ahmed<sup>2,3\*</sup>, M. Hagar<sup>2,4\*</sup>

<sup>1</sup> College of Sciences, Chemistry Department, Madina Monawara, Taibah University, Saudi Arabia, (OH) alhaddad105@yahoo.com.

<sup>2</sup> College of Sciences, Chemistry Department, Yanbu, Taibah University, Saudi Arabia., (HA) ahoda@sci.cu.edu.eg, (MH) mohamedhaggar@gmail.com

<sup>3</sup> Faculty of Science, Department of Chemistry, Cairo University, Cairo, Egypt.

<sup>4</sup> Faculty of Science, Chemistry Department, Alexandria University, Alexandria, Egypt

\* Correspondence: H.A. Ahmed, ahoda@sci.cu.edu.eg; M. Hagar, mohamedhaggar@gmail.com.

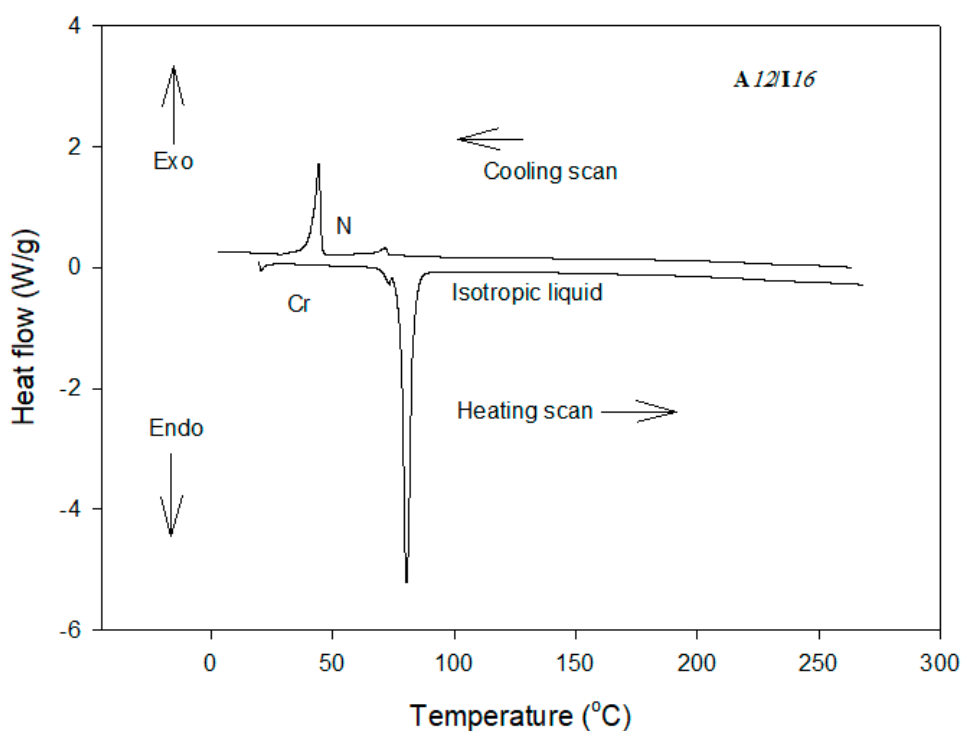

**Figure S1.** DSC thermograms of A12I16 supramolecular complex upon heating and cooling cycles with heating rate 10 °C/min.

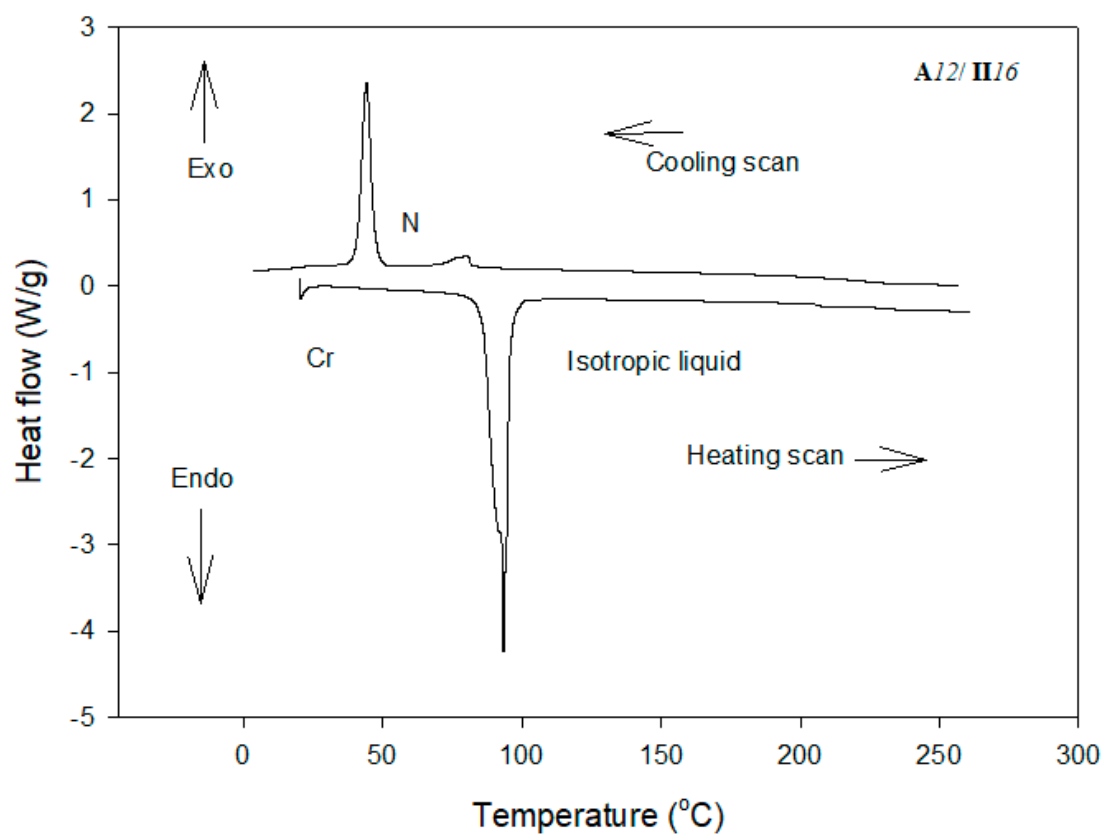

**Figure S2.** DSC thermograms of A12/II16 supramolecular complex upon heating and cooling cycles with heating rate 10 °C/min.

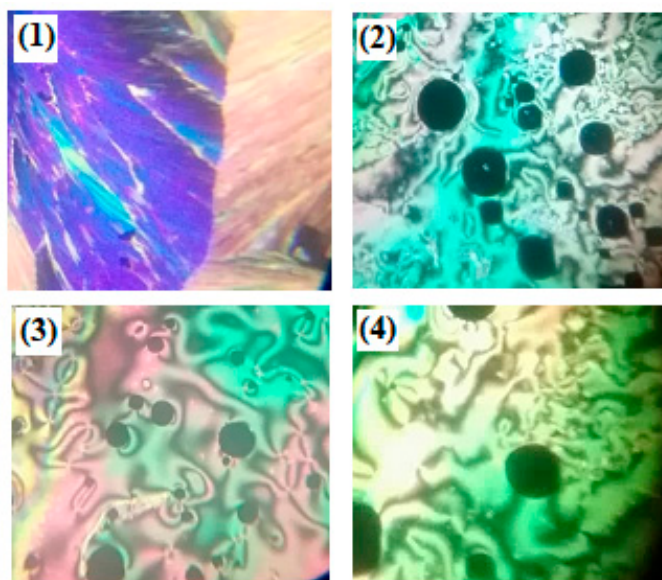

**Figure S3:** Some textures (Size:  $41.8 \times 10^6$  nm) under POM of the supramolecular complexes upon heating (1) solid phase of **A10/I8** at 52.0 °C; (2) nematic phase of **A6/I8** at 75.0 °C; (3) nematic phase of **A6/II8** at 112.0 °C; and (4) nematic phase of **A8/II8** at 85.0 °C.

**Table S1:** Normalized entropy change ( $\Delta S/R$ ) for the supramolecular complexes **An/III16** and **An/IV16**.

| System            | $\Delta S/R$ |
|-------------------|--------------|
| <b>A6/III16</b>   | 1.18         |
| <b>A8/ III16</b>  | 1.42         |
| <b>A10/ III16</b> | 2.27         |
| <b>A12/ III16</b> | 2.40         |
| <b>A8/IV16</b>    | 0.50         |
| <b>A10/ IV16</b>  | 0.41         |
| <b>A12/ IV16</b>  | 2.22         |
| <b>A14/ IV16</b>  | 2.19         |
